# Supplementary material
Source: Springer Nature journal article supplement (https://www.springermedizin.de/resource/supplementary/12879_2012_2323_MOESM2_ESM.pdf/9445510)
Supplement: MOESM2 [file 9445510]

# sources of articles on nosocomial outbreaks used

Outbreak Database

[www.outbreak-database.com](http://www.outbreak-database.com)

**222 hits**

PubMed

[www.pubmed.gov](http://www.pubmed.gov)

**609 hits**

reference lists

**31 hits**

106

604

## reasons for exclusion:

- duplicates
- language
- review
- unrelated topic

116

5

31

**152 nosocomial outbreaks included in this review**
